# Supplementary material
Source: HighWire-hosted journal article supplement (https://informatics.bmj.com/content/30/1/e100781)
Supplement: inline-supplementary-material-3 [file inline-supplementary-material-3.pdf]

**1-111: Registration Form**

|                                                                                                                                                                                                                                                                                                                                                                                                                                                                                                                                                                                                                                                                                                                                                                                                                                            |                                                                                                                                                                                              |
|--------------------------------------------------------------------------------------------------------------------------------------------------------------------------------------------------------------------------------------------------------------------------------------------------------------------------------------------------------------------------------------------------------------------------------------------------------------------------------------------------------------------------------------------------------------------------------------------------------------------------------------------------------------------------------------------------------------------------------------------------------------------------------------------------------------------------------------------|----------------------------------------------------------------------------------------------------------------------------------------------------------------------------------------------|
| Parent/Guardian Surname *                                                                                                                                                                                                                                                                                                                                                                                                                                                                                                                                                                                                                                                                                                                                                                                                                  | Parent/Guardian First Name *                                                                                                                                                                 |
| Relationship to Infant *                                                                                                                                                                                                                                                                                                                                                                                                                                                                                                                                                                                                                                                                                                                                                                                                                   |                                                                                                                                                                                              |
| <input type="radio"/> Mother<br><input type="radio"/> Father<br><input type="radio"/> Legal Guardian                                                                                                                                                                                                                                                                                                                                                                                                                                                                                                                                                                                                                                                                                                                                       |                                                                                                                                                                                              |
| Infant First Name *                                                                                                                                                                                                                                                                                                                                                                                                                                                                                                                                                                                                                                                                                                                                                                                                                        |                                                                                                                                                                                              |
| Infant Date of Birth *                                                                                                                                                                                                                                                                                                                                                                                                                                                                                                                                                                                                                                                                                                                                                                                                                     |                                                                                                                                                                                              |
| yyyy-mm-dd                                                                                                                                                                                                                                                                                                                                                                                                                                                                                                                                                                                                                                                                                                                                                                                                                                 |                                                                                                                                                                                              |
| Infant Sex *                                                                                                                                                                                                                                                                                                                                                                                                                                                                                                                                                                                                                                                                                                                                                                                                                               |                                                                                                                                                                                              |
| <input type="radio"/> Boy<br><input type="radio"/> Girl                                                                                                                                                                                                                                                                                                                                                                                                                                                                                                                                                                                                                                                                                                                                                                                    |                                                                                                                                                                                              |
| Family's First Language *                                                                                                                                                                                                                                                                                                                                                                                                                                                                                                                                                                                                                                                                                                                                                                                                                  |                                                                                                                                                                                              |
| Family's Preferred Language *                                                                                                                                                                                                                                                                                                                                                                                                                                                                                                                                                                                                                                                                                                                                                                                                              |                                                                                                                                                                                              |
| Select Infant's Gestational Age at Birth *                                                                                                                                                                                                                                                                                                                                                                                                                                                                                                                                                                                                                                                                                                                                                                                                 | And days: *                                                                                                                                                                                  |
| <i>Weeks</i><br><input type="radio"/> 0 <input type="radio"/> 1 <input type="radio"/> 2<br><input type="radio"/> 3 <input type="radio"/> 4 <input type="radio"/> 5<br><input type="radio"/> 6 <input type="radio"/> 7 <input type="radio"/> 8<br><input type="radio"/> 9 <input type="radio"/> 10 <input type="radio"/> 11<br><input type="radio"/> 12 <input type="radio"/> 13 <input type="radio"/> 14<br><input type="radio"/> 15 <input type="radio"/> 16 <input type="radio"/> 17<br><input type="radio"/> 18 <input type="radio"/> 19 <input type="radio"/> 20<br><input type="radio"/> 21 <input type="radio"/> 22 <input type="radio"/> 23<br><input type="radio"/> 24 <input type="radio"/> 25 <input type="radio"/> 26<br><input type="radio"/> 27 <input type="radio"/> 28 <input type="radio"/> 29<br><input type="radio"/> 30 | <i>Days</i><br><input type="radio"/> 0 <input type="radio"/> 1 <input type="radio"/> 2<br><input type="radio"/> 3 <input type="radio"/> 4 <input type="radio"/> 5<br><input type="radio"/> 6 |
| Infant NHS Number *                                                                                                                                                                                                                                                                                                                                                                                                                                                                                                                                                                                                                                                                                                                                                                                                                        |                                                                                                                                                                                              |
| Name of person explaining the ePARCA-R process (enrolling participants) *                                                                                                                                                                                                                                                                                                                                                                                                                                                                                                                                                                                                                                                                                                                                                                  |                                                                                                                                                                                              |
| Hospital *                                                                                                                                                                                                                                                                                                                                                                                                                                                                                                                                                                                                                                                                                                                                                                                                                                 |                                                                                                                                                                                              |
| GP Address *                                                                                                                                                                                                                                                                                                                                                                                                                                                                                                                                                                                                                                                                                                                                                                                                                               |                                                                                                                                                                                              |
| GP Postcode *                                                                                                                                                                                                                                                                                                                                                                                                                                                                                                                                                                                                                                                                                                                                                                                                                              |                                                                                                                                                                                              |
